# Supplementary material
Source: PubMed Central journal article supplement (PMC5650524)
Supplement: NIHMS903965-supplement-8.pdf [file NIHMS903965-supplement-8.pdf]

**Table S1: Chemical shift assignments from solid state NMR spectra of FUS-LC fibrils, Related to Fig. 3.** Chemical shifts are in parts per million relative to  $\text{NH}_3(\text{l})$  for  $^{15}\text{N}$  and relative to DSS for  $^{13}\text{C}$ . Uncertainties in chemical shifts are approximately  $\pm 0.25$  ppm for  $^{15}\text{N}$  and  $\pm 0.15$  ppm for  $^{13}\text{C}$ . Backbone  $\phi$  and  $\psi$  torsion angle predictions based on these chemical shifts are from TALOS-N, with error limits representing uncertainties reported by TALOS-N.

| residue | chemical shifts (ppm) |                        |                  |                       |                        |                        |                          |                       | predicted torsion angles (°) |                         |
|---------|-----------------------|------------------------|------------------|-----------------------|------------------------|------------------------|--------------------------|-----------------------|------------------------------|-------------------------|
|         | $^{15}\text{N}$       | $^{13}\text{C}_\alpha$ | $^{13}\text{CO}$ | $^{13}\text{C}_\beta$ | $^{13}\text{C}_\gamma$ | $^{13}\text{C}_\delta$ | $^{13}\text{C}_\epsilon$ | $^{13}\text{C}_\zeta$ | $\phi$                       | $\psi$                  |
| S39     | 118.5                 | 57.6                   | 174.6            | 65.6                  |                        |                        |                          |                       |                              |                         |
| G40     | 110.6                 | 47.5                   |                  |                       |                        |                        |                          |                       |                              |                         |
| S44     | 122.1                 | 56.8                   | 173.2            | 65.5                  |                        |                        |                          |                       | $-98 \pm 14$                 | $129 \pm 8$             |
| T45     | 122.5                 | 63.1                   | 172.9            | 71.7                  | 21.9                   |                        |                          |                       | $-114 \pm 12$                | $128 \pm 6$             |
| D46     | 127.4                 | 50.7                   | 176.3            | 42.9                  | 180.9                  |                        |                          |                       | $-108 \pm 13$                | $124 \pm 13$            |
| T47     | 121.8                 | 63.5                   | 173.2            | 71.5                  | 21.9                   |                        |                          |                       | $-115 \pm 16^{*\dagger}$     | $129 \pm 12^{*\dagger}$ |
| S48     | 121.4                 | 59.3                   | 176.1            | 63.4                  |                        |                        |                          |                       | $-76 \pm 19$                 | $138 \pm 14^\dagger$    |
| G49     | 114.4                 | 44.5                   | 173.4            |                       |                        |                        |                          |                       | $77 \pm 10$                  | $19 \pm 18$             |
| Y50     | 104.7                 | 61.7                   | 173.5            | 37.7                  | 128.2                  | 131.4<br>133.5         | 118.8                    | 157.0                 |                              |                         |
| G51     | 108.3                 | 42.9                   | 172.1            |                       |                        |                        |                          |                       |                              |                         |
| Q52     | 110.3                 | 56.4                   | 176.0            | 27.1                  | 35.2                   | 181.1                  |                          |                       |                              |                         |
| S53     | 116.4                 | 58.0                   | 173.0            | 66.5                  |                        |                        |                          |                       | $-120 \pm 27$                | $162 \pm 10$            |
| S54     | 113.9                 | 56.1                   | 175.0            | 65.9                  |                        |                        |                          |                       | $-142 \pm 13$                | $155 \pm 10$            |
| N63     | 126.9                 | 52.4                   | 173.7            | 39.9                  | 176.4                  |                        |                          |                       | $-96 \pm 12$                 | $124 \pm 9$             |
| T64     | 122.9                 | 61.4                   | 173.6            | 70.6                  | 21.9                   |                        |                          |                       | $-105 \pm 13$                | $131 \pm 13$            |
| G65     | 117.2                 | 45.5                   | 171.1            |                       |                        |                        |                          |                       | $-71 \pm 8$                  | $161 \pm 11$            |
| Y66     | 122.9                 | 57.9                   | 177.5            | 41.5                  | 130.1                  | 132.0<br>134.1         | 118.8                    | 156.9                 | $-62 \pm 9$                  | $138 \pm 10^\dagger$    |
| G67     | 114.9                 | 47.1                   | 174.0            |                       |                        |                        |                          |                       | $80 \pm 9^*$                 | $9 \pm 15^{*\dagger}$   |
| T68     | 115.0                 | 61.4                   | 172.0            | 70.1                  |                        |                        |                          |                       | $-105 \pm 20$                | $136 \pm 9$             |
| Q69     | 126.8                 | 53.9                   | 173.6            | 34.2                  | 34.8                   | 177.2                  |                          |                       | $-127 \pm 13$                | $146 \pm 12$            |
| S70     | 120.5                 | 54.8                   | 173.7            | 64.2                  |                        |                        |                          |                       | $-103 \pm 12$                | $140 \pm 11$            |
| T71     |                       | 60.7                   |                  | 70.1                  | 20.5                   |                        |                          |                       | $-67 \pm 9$                  | $146 \pm 11$            |
| P72     | 132.9                 | 62.3                   | 176.6            | 32.3                  | 28.5                   | 47.2                   |                          |                       | $-65 \pm 9$                  | $145 \pm 10$            |
| Q73     | 121.8                 | 54.7                   | 175.3            | 33.4                  | 34.9                   |                        |                          |                       | $-118 \pm 23$                | $158 \pm 14$            |
| G74     | 110.2                 | 46.2                   | 173.9            |                       |                        |                        |                          |                       |                              |                         |
| Y75     | 126.6                 | 59.9                   | 177.6            | 39.7                  | 129.1                  | 131.2<br>133.5         | 117.6<br>118.6           | 157.0                 |                              |                         |
| G76     | 103.3                 | 45.7                   | 175.8            |                       |                        |                        |                          |                       |                              |                         |
| S77     | 119.1                 | 58.6                   | 174.7            | 65.2                  |                        |                        |                          |                       |                              |                         |
| T78     | 123.4                 | 62.6                   | 173.1            | 69.9                  | 19.8                   |                        |                          |                       | $-107 \pm 14$                | $133 \pm 9$             |
| G79     | 116.4                 | 43.6                   | 172.1            |                       |                        |                        |                          |                       |                              |                         |
| G80     | 109.9                 | 43.6                   | 171.6            |                       |                        |                        |                          |                       |                              |                         |
| Y81     | 122.0                 | 61.6                   | 177.1            | 39.6                  | 131.1                  | 131.7<br>131.7         | 117.4<br>117.7           | 157.7                 | $-62 \pm 6^*$                | $141 \pm 8^{*\dagger}$  |
| G82     | 110.1                 | 48.7                   | 174.9            |                       |                        |                        |                          |                       |                              |                         |
| S83     | 109.7                 | 57.5                   | 172.5            | 66.0                  |                        |                        |                          |                       |                              |                         |
| S84     | 116.5                 | 55.9                   | 175.0            | 67.6                  |                        |                        |                          |                       | $-125 \pm 14$                | $149 \pm 11^\dagger$    |
| Q85     | 128.4                 | 54.7                   | 172.3            | 33.4                  | 34.1                   | 180.3                  |                          |                       | $-134 \pm 12^\dagger$        | $150 \pm 10^\dagger$    |
| S86     | 120.9                 | 56.0                   | 174.0            | 67.0                  |                        |                        |                          |                       | $-131 \pm 8$                 | $152 \pm 8$             |
| S87     | 113.0                 | 58.9                   | 172.9            | 65.2                  |                        |                        |                          |                       | $-143 \pm 29$                | $155 \pm 12$            |
| Q88     | 120.2                 | 56.4                   | 176.4            | 31.9                  | 34.1                   | 179.0                  |                          |                       |                              |                         |

|     |       |      |       |      |       |                |       |       |           |           |
|-----|-------|------|-------|------|-------|----------------|-------|-------|-----------|-----------|
| S89 | 117.1 | 56.6 | 173.4 | 66.0 |       |                |       |       | -128 ± 14 | 148 ± 12  |
| S90 | 118.2 | 54.6 | 173.1 | 64.4 |       |                |       |       | -116 ± 16 | 143 ± 18  |
| Y91 | 123.7 | 55.2 | 175.8 | 39.2 | 129.1 | 132.6<br>133.4 | 117.1 | 157.8 |           |           |
| G92 | 100.3 | 46.6 | 174.4 |      |       |                |       |       |           |           |
| Q93 | 116.2 | 58.3 | 175.6 | 28.7 | 36    | 177.5          |       |       | -66 ± 8*  | 139 ± 12* |
| Q94 | 117.5 | 54.8 | 175.6 | 34.2 |       | 177.7          |       |       | -128 ± 13 | 147 ± 12  |
| S95 | 121.7 | 56.2 | 173.8 | 65.2 |       |                |       |       | -101 ± 24 | 151 ± 15  |

\*Predictions classified as "generous" by TALOS-N. All other predictions are "strong".

†Predictions not used as restraints in structure calculations, due to conflicts with <sup>15</sup>N-BARE data.

**Table S2. Chemical shifts of unassigned signals in 3D solid state NMR spectra of FUS-LC fibrils, Related to Fig. 3.** Possible assignments are listed when a signal was assigned to residues 1-112 in at least one of 50 massign2b runs with a connection to a neighboring residue.

| 3D spectrum | chemical shifts (ppm) |                              |                  |                              |                              | residue type     | possible assignments |
|-------------|-----------------------|------------------------------|------------------|------------------------------|------------------------------|------------------|----------------------|
|             | <sup>15</sup> N       | <sup>13</sup> C <sub>α</sub> | <sup>13</sup> CO | <sup>13</sup> C <sub>β</sub> | <sup>13</sup> C <sub>γ</sub> |                  |                      |
| NCACX       | 108.2                 | 45.2                         |                  |                              |                              | G                | 111                  |
|             | 111.5                 | 58.7                         | 171.7            | 69.1                         |                              | S                | -                    |
|             | 114.1                 | 59.3                         | 171.7            | 65.9                         |                              | S                | 26, 30               |
|             | 114.5                 | 55.8                         | 171.9            | 67.1                         |                              | S                | 26, 30, 61           |
|             | 117.2                 | 56.2                         | 171.6            | 65.0                         |                              | S                | 42, 57               |
|             | 120.5                 | 54.7                         | 173.6            | 28.5                         | 35.0                         | Q                | 36, 62               |
|             | 121.0                 | 56.4                         | 176.4            | 31.4                         | 34.2                         | Q                | 27, 31, 43           |
|             | 121.5                 | 54.6                         | 174.2            | 32.9                         | 35.0                         | Q                | 27, 31               |
|             | 123.7                 | 54.3                         | 173.0            | 32.0                         | 33.8                         | Q                | 31, 36, 103          |
|             | 124.3                 | 57.0                         | 173.8            |                              |                              | Q, S, Y, N, or D | -                    |
| 125.4       | 54.9                  | 177.7                        | 34.0             |                              | Q                            | -                |                      |
| NCOCX       | 114.1                 | 55.2                         | 175.5            |                              |                              | Q, S, Y, N, or D | 41, 55               |
|             | 114.5                 | 58.8                         | 171.8            | 69.1                         |                              | S                | 110, 112             |
|             | 117.2                 | 54.9                         | 174.8            |                              |                              | Q, S, Y, N, or D | 55, 56               |
|             | 120.2                 | 56.2                         | 172.9            |                              |                              | Q, S, Y, N, or D | 27, 35, 61           |
|             | 121.0                 | 55.7                         | 172.0            | 67.0                         |                              | S                | 26, 30, 42, 61       |
|             | 121.9                 | 59.3                         | 171.8            | 66.0                         |                              | S                | 26, 30               |
|             | 123.7                 | 57.0                         | 173.9            |                              |                              | Q, S, Y, N, or D | 8, 36, 102           |
|             | 125.2                 | 59.9                         | 171.4            | 65.5                         |                              | Q, S, Y, N, or D | -                    |
|             | 126.8                 | 54.3                         | 173.1            | 32.5                         | 33.7                         | Q                | -                    |
|             | 127.8                 | 56.2                         | 171.5            | 64.9                         |                              | S                | 112                  |
| 107.6       | 48.9                  | 177.2                        |                  |                              | G                            | -                |                      |
| CONCA       | 111.5                 | 58.6                         | 175.5            |                              |                              | Q, S, Y, N, or D | 112                  |
|             | 112.4                 | 55.3                         | 171.6            |                              |                              | Q, S, Y, N, or D | 41                   |
|             | 114.5                 | 59.2                         | 176.0            |                              |                              | Q, S, Y, N, or D | 26, 30               |
|             | 114.6                 | 55.7                         | 172.3            |                              |                              | Q, S, Y, N, or D | 26, 30               |
|             | 117.8                 | 55.9                         | 174.9            |                              |                              | Q, S, Y, N, or D | 27, 35, 102          |
|             | 121.4                 | 54.6                         | 172.0            |                              |                              | Q, S, Y, N, or D | 27, 31               |
|             | 122.4                 | 56.6                         | 174.0            |                              |                              | Q, S, Y, N, or D | 35, 37, 61, 103      |
|             | 123.3                 | 58.4                         | 174.5            |                              |                              | Q, S, Y, N, or D | -                    |
|             | 123.6                 | 54.3                         | 174.0            |                              |                              | Q, S, Y, N, or D | 9, 31, 37, 103       |
|             | 125.0                 | 54.9                         | 171.6            |                              |                              | Q, S, Y, N, or D | 36, 56, 103          |
|             | 126.8                 | 55.1                         | 171.6            |                              |                              | Q, S, Y, N, or D | -                    |
| 112.7       | 55.7                  | 58.2                         | 173.0            |                              | Q, S, Y, N, or D             | -                |                      |

**Table S3. Summary of NMR measurement conditions, Related to Fig. 2.**<sup>1</sup>

| Sample            | Spectrum    | NMR parameters                                                                                                                                                                                                                                                                                                                                                                                                                                                                                                    | Total time | Processing                                                             |
|-------------------|-------------|-------------------------------------------------------------------------------------------------------------------------------------------------------------------------------------------------------------------------------------------------------------------------------------------------------------------------------------------------------------------------------------------------------------------------------------------------------------------------------------------------------------------|------------|------------------------------------------------------------------------|
| U-FUS-LC, 10 mg   | 2D CC       | $B_0 = 17.5$ T; $V_{MAS} = 17.0$ kHz; $na = 240$ ; $\tau_{pd} = 2.5$ s; $t_{1max} = 8.6$ ms; $t_{1inc} = 24$ $\mu$ s; $\tau_{dwell} = 15$ $\mu$ s; $\tau_{acq} = 15.4$ ms; $\tau_{HC} = 1.5$ ms; $\tau_{DARR} = 25$ ms; $\nu_{1H} = 85$ kHz                                                                                                                                                                                                                                                                       | 120 h      | GB = 75 Hz in $t_1$ ;<br>GB = 75 Hz in $t_2$                           |
| U-FUS-LC, 10 mg   | 2D NCA      | $B_0 = 21.1$ T; $V_{MAS} = 11$ kHz; $na = 64$ ; $\tau_{pd} = 2.0$ s; $t_{1max} = 12.7$ ms; $t_{1inc} = 201.6$ $\mu$ s; $\tau_{dwell} = 10$ $\mu$ s; $\tau_{acq} = 20.5$ ms; $\tau_{HN} = 1$ ms; $\tau_{NC} = 4$ ms; $\nu_{1H} = 85$ kHz; $\nu_{1C} = 42$ kHz, $\nu_{1N} = 31$ kHz, and $\nu_{0C} = 53$ ppm during $\tau_{NC}$                                                                                                                                                                                     | 5 h        | GB = 10 Hz in $t_1$ ;<br>GB = 50 Hz in $t_2$                           |
| U-FUS-LC, 10 mg   | 2D HC INEPT | $B_0 = 14.1$ T; $V_{MAS} = 12$ kHz; $na = 32$ ; $\tau_{pd} = 2.0$ s; $t_{1max} = 10$ ms; $t_{1inc} = 50$ $\mu$ s; $\tau_{dwell} = 15$ $\mu$ s; $\tau_{acq} = 15.4$ ms; $\nu_{1H} = 13$ kHz                                                                                                                                                                                                                                                                                                                        | 7 h        | GB = 10 Hz in $t_1$ ;<br>GB = 50 Hz in $t_2$                           |
| U-FUS-LC, 10 mg   | 2D HN INEPT | $B_0 = 17.5$ T; $V_{MAS} = 17.0$ kHz; $na = 64$ ; $\tau_{pd} = 2.0$ s; $t_{1max} = 14$ ms; $t_{1inc} = 200$ $\mu$ s; $\tau_{dwell} = 15$ $\mu$ s; $\tau_{acq} = 30.7$ ms; $\nu_{1H} = 38$ kHz                                                                                                                                                                                                                                                                                                                     | 5 h        | GB = 0 Hz in $t_1$ ;<br>GB = 0 Hz in $t_2$                             |
| U-FUS-LC, 10 mg   | 3D NCACX    | $B_0 = 21.1$ T; $V_{MAS} = 13.8$ kHz; $na = 8$ ; $\tau_{pd} = 2.0$ s; $t_{1max} = 12$ ms; $t_{1inc} = 222$ $\mu$ s; $t_{2max} = 6.8$ ms; $t_{2inc} = 109$ $\mu$ s; $\tau_{dwell} = 5$ $\mu$ s; $\tau_{acq} = 10.2$ ms; $\tau_{HN} = 1$ ms; $\tau_{NC} = 4$ ms; $\tau_{DARR} = 50$ ms; $\nu_{1H} = 85$ kHz; $\nu_{1C} = 22$ kHz, $\nu_{1N} = 36$ kHz, and $\nu_{0C} = 53$ ppm during $\tau_{NC}$                                                                                                                   | 60 h       | GB = 15 Hz in $t_1$ ;<br>GB = 25 Hz in $t_2$ ;<br>GB = 25 Hz in $t_3$  |
| U-FUS-LC, 10 mg   | 3D NCOCX    | $B_0 = 21.1$ T; $V_{MAS} = 13.8$ kHz; $na = 16$ ; $\tau_{pd} = 2.0$ s; $t_{1max} = 12$ ms; $t_{1inc} = 222$ $\mu$ s; $t_{2max} = 9.1$ ms; $t_{2inc} = 222$ $\mu$ s; $\tau_{dwell} = 5$ $\mu$ s; $\tau_{acq} = 10.2$ ms; $\tau_{HN} = 1$ ms; $\tau_{NC} = 4$ ms; $\tau_{DARR} = 50$ ms; $\nu_{1H} = 83$ kHz; $\nu_{1C} = 52$ kHz, $\nu_{1N} = 39$ kHz, and $\nu_{0C} = 175$ ppm during $\tau_{NC}$                                                                                                                 | 79 h       | GB = 15 Hz in $t_1$ ;<br>GB = 25 Hz in $t_2$ ;<br>GB = 25 Hz in $t_3$  |
| U-FUS-LC, 10 mg   | 3D CONCA    | $B_0 = 14.1$ T; $V_{MAS} = 12$ kHz; $na = 16$ ; $\tau_{pd} = 2.0$ s; $t_{1max} = 5.9$ ms; $t_{1inc} = 196$ $\mu$ s; $t_{2max} = 11.8$ ms; $t_{2inc} = 196$ $\mu$ s; $\tau_{dwell} = 15$ $\mu$ s; $\tau_{acq} = 7.7$ ms; $\tau_{HC} = 1.5$ ms; $\tau_{CN} = 4$ ms; $\tau_{NC} = 4$ ms; $\nu_{1H} = 70$ kHz; $\nu_{1C} = 29$ kHz, $\nu_{1N} = 17$ kHz, and $\nu_{0C} = 168$ ppm during $\tau_{CN}$ ; $\nu_{1C} = 29$ kHz, $\nu_{1N} = 17$ kHz, and $\nu_{0C} = 60$ ppm during $\tau_{NC}$                           | 68 h       | GB = 25 Hz in $t_1$ ;<br>GB = 15 Hz in $t_2$ ;<br>GB = 25 Hz in $t_3$  |
| U-FUS-LC, 10 mg   | 3D CANCEX   | $B_0 = 14.1$ T; $V_{MAS} = 12$ kHz; $na = 256$ ; $\tau_{pd} = 2.0$ s; $t_{1max} = 4.0$ ms; $t_{1inc} = 165.2$ $\mu$ s; $t_{2max} = 6.6$ ms; $t_{2inc} = 165.2$ $\mu$ s; $\tau_{dwell} = 15$ $\mu$ s; $\tau_{acq} = 7.7$ ms; $\tau_{HC} = 1.5$ ms; $\tau_{CN} = 4$ ms; $\tau_{NC} = 4$ ms; $\tau_{DARR} = 60$ ms; $\nu_{1H} = 85$ kHz; $\nu_{1C} = 26$ kHz, $\nu_{1N} = 14$ kHz, and $\nu_{0C} = 56$ ppm during $\tau_{CN}$ ; $\nu_{1C} = 16$ kHz, $\nu_{1N} = 4$ kHz, and $\nu_{0C} = 175$ ppm during $\tau_{NC}$ | 578 h      | GB = 50 Hz in $t_1$ ;<br>GB = 30 Hz in $t_2$ ;<br>GB = 50 Hz in $t_3$  |
| N112-FUS-LC, 6 mg | 1D HC CP    | $B_0 = 14.1$ T; $V_{MAS} = 13.6$ kHz; $na = 32$ ; $\tau_{pd} = 3.0$ s; $\tau_{dwell} = 15$ $\mu$ s; $\tau_{acq} = 7.7$ ms; $\tau_{HC} = 1.5$ ms; $\nu_{1H} = 93$ kHz                                                                                                                                                                                                                                                                                                                                              | 0.03 h     | GB = 80 Hz                                                             |
| N112-FUS-LC, 6 mg | 1D HC INEPT | $B_0 = 14.1$ T; $V_{MAS} = 13.6$ kHz; $na = 128$ ; $\tau_{pd} = 2.0$ s; $\tau_{dwell} = 15$ $\mu$ s; $\tau_{acq} = 30.7$ ms; $\nu_{1H} = 16$ kHz                                                                                                                                                                                                                                                                                                                                                                  | 0.07 h     | GB = 20 Hz                                                             |
| N112-FUS-LC, 6 mg | 2D CC       | $B_0 = 14.1$ T; $V_{MAS} = 13.6$ kHz; $na = 32$ ; $\tau_{pd} = 3.0$ s; $t_{1max} = 5.5$ ms; $t_{1inc} = 21.6$ $\mu$ s; $\tau_{dwell} = 15$ $\mu$ s; $\tau_{acq} = 7.7$ ms; $\tau_{HC} = 1.5$ ms; $\tau_{DARR} = 50$ ms; $\nu_{1H} = 93$ kHz                                                                                                                                                                                                                                                                       | 14 h       | GB = 75 Hz in $t_1$ ;<br>GB = 75 Hz in $t_2$                           |
| N112-FUS-LC, 6 mg | 2D NCA      | $B_0 = 14.1$ T; $V_{MAS} = 13.6$ kHz; $na = 384$ ; $\tau_{pd} = 2.2$ s; $t_{1max} = 12.4$ ms; $t_{1inc} = 129.6$ $\mu$ s; $\tau_{dwell} = 15$ $\mu$ s; $\tau_{acq} = 7.7$ ms; $\tau_{HN} = 1.5$ ms; $\tau_{NC} = 4$ ms; $\nu_{1H} = 93$ kHz; $\nu_{1C} = 34$ kHz, $\nu_{1N} = 21$ kHz, and $\nu_{0C} = 55$ ppm during $\tau_{NC}$                                                                                                                                                                                 | 45 h       | GB = 0 Hz in $t_1$ ;<br>GB = 75 Hz in $t_2$                            |
| N112-FUS-LC, 6 mg | 3D NCACX    | $B_0 = 17.5$ T; $V_{MAS} = 17$ kHz; $na = 32$ ; $\tau_{pd} = 1.5$ s; $t_{1max} = 6.9$ ms; $t_{1inc} = 172.8$ $\mu$ s; $t_{2max} = 5.2$ ms; $t_{2inc} = 64.8$ $\mu$ s; $\tau_{dwell} = 15$ $\mu$ s; $\tau_{acq} = 7.7$ ms; $\tau_{HC} = 1.5$ ms; $\tau_{NC} = 5$ ms; $\tau_{DARR} = 50$ ms; $\nu_{1H} = 93$ kHz; $\nu_{1C} = 43$ kHz, $\nu_{1N} = 26$ kHz, and $\nu_{0C} = 51$ ppm during $\tau_{NC}$                                                                                                              | 170 h      | GB = 10 Hz in $t_1$ ;<br>GB = 10 Hz in $t_2$ ;<br>GB = 100 Hz in $t_3$ |
| N112-FUS-LC, 6 mg | 3D CONCA    | $B_0 = 17.5$ T; $V_{MAS} = 17$ kHz; $na = 128$ ; $\tau_{pd} = 2.0$ s; $t_{1max} = 4.4$ ms; $t_{1inc} = 259.2$ $\mu$ s; $t_{2max} = 6.9$ ms; $t_{2inc} = 172.8$ $\mu$ s; $\tau_{dwell} = 15$ $\mu$ s; $\tau_{acq} = 7.7$ ms; $\tau_{HC} = 1.5$ ms; $\tau_{CN} = 4$ ms; $\tau_{NC} = 5$ ms; $\nu_{1H} = 93$ kHz; $\nu_{1C} = 43$ kHz, $\nu_{1N} = 26$ kHz, and $\nu_{0C} = 175$ ppm during $\tau_{CN}$ ; $\nu_{1C} = 43$ kHz, $\nu_{1N} = 26$ kHz, and $\nu_{0C} = 51$ ppm during $\tau_{NC}$                       | 192 h      | GB = 10 Hz in $t_1$ ;<br>GB = 10 Hz in $t_2$ ;<br>GB = 100 Hz in $t_3$ |
| C112-FUS-LC, 4 mg | 1D HC CP    | $B_0 = 14.1$ T; $V_{MAS} = 13.6$ kHz; $na = 128$ ; $\tau_{pd} = 2.0$ s; $\tau_{dwell} = 15$ $\mu$ s; $\tau_{acq} = 7.7$ ms; $\tau_{HC} = 1.5$ ms; $\nu_{1H} = 90$ kHz                                                                                                                                                                                                                                                                                                                                             | 0.07 h     | GB = 80 Hz                                                             |
| C112-FUS-LC, 4 mg | 1D HC INEPT | $B_0 = 14.1$ T; $V_{MAS} = 13.6$ kHz; $na = 128$ ; $\tau_{pd} = 2.0$ s; $\tau_{dwell} = 15$ $\mu$ s; $\tau_{acq} = 30.7$ ms; $\nu_{1H} = 16$ kHz                                                                                                                                                                                                                                                                                                                                                                  | 0.07 h     | GB = 20 Hz                                                             |
| C112-FUS-LC, 4 mg | 2D CC       | $B_0 = 14.1$ T; $V_{MAS} = 13.6$ kHz; $na = 192$ ; $\tau_{pd} = 2.2$ s; $t_{1max} = 4$ ms; $t_{1inc} = 22.4$ $\mu$ s; $\tau_{dwell} = 15$ $\mu$ s; $\tau_{acq} = 7.7$ ms; $\tau_{HC} = 1.5$ ms; $\tau_{DARR} = 50$ ms; $\nu_{1H} = 78$ kHz                                                                                                                                                                                                                                                                        | 42 h       | GB = 75 Hz in $t_1$ ;<br>GB = 75 Hz in $t_2$                           |
| C112-FUS-LC, 4 mg | 2D NCA      | $B_0 = 14.1$ T; $V_{MAS} = 13.6$ kHz; $na = 2880$ ; $\tau_{pd} = 2.2$ s; $t_{1max} = 8.6$ ms; $t_{1inc} = 134.4$ $\mu$ s; $\tau_{dwell} = 15$ $\mu$ s; $\tau_{acq} = 7.7$ ms; $\tau_{HN} = 1.5$ ms; $\tau_{NC} = 4$ ms; $\nu_{1H} = 78$ kHz; $\nu_{1C} = 34$ kHz, $\nu_{1N} = 21$ kHz, and $\nu_{0C} = 55$ ppm during $\tau_{NC}$                                                                                                                                                                                 | 225 h      | GB = 50 Hz in $t_1$ ;<br>GB = 75 Hz in $t_2$                           |
| N60-FUS-LC, 4 mg  | 1D HC CP    | $B_0 = 14.1$ T; $V_{MAS} = 13.6$ kHz; $na = 1024$ ; $\tau_{pd} = 2.0$ s; $\tau_{dwell} = 15$ $\mu$ s; $\tau_{acq} = 7.7$ ms; $\tau_{HC} = 1.5$ ms; $\nu_{1H} = 90$ kHz                                                                                                                                                                                                                                                                                                                                            | 0.6 h      | GB = 80 Hz                                                             |

|                                     |                      |                                                                                                                                                                                                                                                                                                                                                                                                                                                                                                                                         |                               |                                                                       |
|-------------------------------------|----------------------|-----------------------------------------------------------------------------------------------------------------------------------------------------------------------------------------------------------------------------------------------------------------------------------------------------------------------------------------------------------------------------------------------------------------------------------------------------------------------------------------------------------------------------------------|-------------------------------|-----------------------------------------------------------------------|
| N60-FUS-LC, 4 mg                    | 1D HC INEPT          | $B_0 = 14.1$ T; $v_{MAS} = 13.6$ kHz; $na = 1024$ ; $\tau_{pd} = 1.5$ s; $\tau_{dwell} = 15$ $\mu$ s; $\tau_{acq} = 30.7$ ms; $v_{1H} = 13$ kHz                                                                                                                                                                                                                                                                                                                                                                                         | 0.4 h                         | GB = 20 Hz                                                            |
| N60-FUS-LC, 4 mg                    | 2D CC                | $B_0 = 14.1$ T; $v_{MAS} = 13.6$ kHz; $na = 128$ ; $\tau_{pd} = 2.0$ s; $t_{1max} = 5.4$ ms; $t_{1inc} = 21.2$ $\mu$ s; $\tau_{dwell} = 15$ $\mu$ s; $\tau_{acq} = 7.7$ ms; $\tau_{HC} = 1.5$ ms; $\tau_{DARR} = 50$ ms; $v_{1H} = 93$ kHz                                                                                                                                                                                                                                                                                              | 36 h                          | GB = 0 Hz in $t_1$ :<br>GB = 75 Hz in $t_2$                           |
| N60-FUS-LC, 4 mg                    | 2D NCA               | $B_0 = 17.5$ T; $v_{MAS} = 17.0$ kHz; $na = 512$ ; $\tau_{pd} = 2.0$ s; $t_{1max} = 5.4$ ms; $t_{1inc} = 84$ $\mu$ s; $\tau_{dwell} = 15$ $\mu$ s; $\tau_{acq} = 7.7$ ms; $\tau_{HN} = 1.5$ ms; $\tau_{NC} = 4$ ms; $v_{1H} = 83$ kHz; $v_{1C} = 24$ kHz, $v_{1N} = 7$ kHz, and $v_{0C} = 53$ ppm during $\tau_{NC}$                                                                                                                                                                                                                    | 36 h                          | GB = 55 Hz in $t_1$ :<br>GB = 75 Hz in $t_2$                          |
| C60-FUS-LC, 3 mg                    | 1D HC CP             | $B_0 = 14.1$ T; $v_{MAS} = 13.6$ kHz; $na = 1024$ ; $\tau_{pd} = 2.0$ s; $\tau_{dwell} = 15$ $\mu$ s; $\tau_{acq} = 7.7$ ms; $\tau_{HC} = 1.5$ ms; $v_{1H} = 90$ kHz                                                                                                                                                                                                                                                                                                                                                                    | 0.6 h                         | GB = 80 Hz                                                            |
| C60-FUS-LC, 3 mg                    | 1D HC INEPT          | $B_0 = 14.1$ T; $v_{MAS} = 13.6$ kHz; $na = 1024$ ; $\tau_{pd} = 1.5$ s; $\tau_{dwell} = 15$ $\mu$ s; $\tau_{acq} = 30.7$ ms; $v_{1H} = 13$ kHz                                                                                                                                                                                                                                                                                                                                                                                         | 0.4 h                         | GB = 20 Hz                                                            |
| C60-FUS-LC, 3 mg                    | 2D CC                | $B_0 = 14.1$ T; $v_{MAS} = 13.6$ kHz; $na = 192$ ; $\tau_{pd} = 2.0$ s; $t_{1max} = 5.4$ ms; $t_{1inc} = 21.2$ $\mu$ s; $\tau_{dwell} = 15$ $\mu$ s; $\tau_{acq} = 7.7$ ms; $\tau_{HC} = 1.5$ ms; $\tau_{DARR} = 50$ ms; $v_{1H} = 90$ kHz                                                                                                                                                                                                                                                                                              | 55 h                          | GB = 0 Hz in $t_1$ :<br>GB = 75 Hz in $t_2$                           |
| C60-FUS-LC, 3 mg                    | 2D NCA               | $B_0 = 17.5$ T; $v_{MAS} = 17.0$ kHz; $na = 896$ ; $\tau_{pd} = 2.0$ s; $t_{1max} = 5.4$ ms; $t_{1inc} = 84$ $\mu$ s; $\tau_{dwell} = 15$ $\mu$ s; $\tau_{acq} = 7.7$ ms; $\tau_{HN} = 1.5$ ms; $\tau_{NC} = 4$ ms; $v_{1H} = 83$ kHz; $v_{1C} = 24$ kHz, $v_{1N} = 7$ kHz, and $v_{0C} = 53$ ppm during $\tau_{NC}$                                                                                                                                                                                                                    | 64 h                          | GB = 55 Hz in $t_1$ :<br>GB = 75 Hz in $t_2$                          |
| 1- <sup>13</sup> C-Tyr-FUS-LC, 5 mg | PITHIRDS-CT          | $B_0 = 9.4$ T; $v_{MAS} = 20.0$ kHz; $na = 256$ ; $\tau_{pd} = 4$ s; $v_{1H} = 100$ kHz during 38.4 ms constant-time recoupling period; $\tau_{dwell} = 20$ $\mu$ s; $\tau_{acq} = 41.0$ ms; $v_{1H} = 70$ kHz with pulsed spin-locking of <sup>13</sup> C during $\tau_{acq}$                                                                                                                                                                                                                                                          | 2.6 h                         | GB = 20 Hz                                                            |
| 1- <sup>13</sup> C-Thr-FUS-LC, 5 mg | PITHIRDS-CT          | $B_0 = 9.4$ T; $v_{MAS} = 20.0$ kHz; $na = 1216$ ; $\tau_{pd} = 4$ s; $v_{1H} = 100$ kHz during 38.4 ms constant-time recoupling period; $\tau_{dwell} = 20$ $\mu$ s; $\tau_{acq} = 41.0$ ms; $v_{1H} = 70$ kHz with pulsed spin-locking of <sup>13</sup> C during $\tau_{acq}$                                                                                                                                                                                                                                                         | 12.5 h                        | GB = 20 Hz                                                            |
| U-FUS-LC, 10 mg                     | <sup>15</sup> N-BARE | $B_0 = 17.5$ T; $v_{MAS} = 17$ kHz; $na = 384$ ; $\tau_{pd} = 2.0$ s; $t_{1max} = 8.9$ ms; $t_{1inc} = 120$ $\mu$ s; $\tau_{dwell} = 15$ $\mu$ s; $\tau_{acq} = 5.5$ ms; $\tau_{HN} = 1.5$ ms; $\tau_{NCTEDOR} = 0.7$ ms; $v_{1H} = 85$ kHz during acquisition and $t_1$ evolution; $v_{0C} = 56$ ppm during $\tau_{NC}$ ; $\tau_{SD} = 30$ ms; 28.2 ms constant-time recoupling period; $v_{NBARE} = 25.5$ kHz; 6 periods of recoupling with 5.6 ms increment between blocks; $v_{1H} = 100$ kHz during constant time recoupling block | 32 h per recoupling increment | GB = 125 Hz in $t_1$ :<br>GB = 60 Hz in $t_2$                         |
| 2-Glyc-FUS-LC, 10 mg                | <sup>15</sup> N-BARE | $B_0 = 17.5$ T; $v_{MAS} = 12$ kHz; $na = 192$ ; $\tau_{pd} = 2.3$ s; $t_{1max} = 7.0$ ms; $t_{1inc} = 100.8$ $\mu$ s; $\tau_{dwell} = 15$ $\mu$ s; $\tau_{acq} = 5.5$ ms; $\tau_{HN} = 1.5$ ms; $\tau_{NC} = 4$ ms; $v_{1H} = 85$ kHz; $v_{1C} = 28$ kHz, $v_{1N} = 16$ kHz; and $v_{0C} = 53$ ppm during $\tau_{NC}$ ; 28 ms constant-time recoupling period; $v_{NBARE} = 18$ kHz; 8 periods of recoupling with 4 ms increment between blocks                                                                                        | 17 h per recoupling increment | GB = 0 Hz in $t_1$ :<br>GB = 0 Hz in $t_2$                            |
| 2-Glyc-FUS-LC, 10 mg                | 3D NCACX             | $B_0 = 21.1$ T; $v_{MAS} = 13.95$ kHz; $na = 16$ ; $\tau_{pd} = 2.0$ s; $t_{1max} = 8.8$ ms; $t_{1inc} = 180$ $\mu$ s; $t_{2max} = 6.1$ ms; $t_{2inc} = 105$ $\mu$ s; $\tau_{dwell} = 5$ $\mu$ s; $\tau_{acq} = 12.0$ ms; $\tau_{HN} = 0.8$ ms; $\tau_{NC} = 6$ ms; $\tau_{DARR} = 400$ ms; $v_{1H} = 83.3$ kHz; $v_{1C} = 22$ kHz, $v_{1N} = 36$ kHz, and $v_{0C} = 56$ ppm during $\tau_{NC}$                                                                                                                                         | 101 h                         | GB = 15 Hz in $t_1$ :<br>GB = 25 Hz in $t_2$ :<br>GB = 25 Hz in $t_3$ |
| 2-Glyc-FUS-LC, 10 mg                | 2D CC                | $B_0 = 17.5$ T; $v_{MAS} = 11.7$ kHz; $na = 80$ ; $\tau_{pd} = 1.5$ s; $t_{1max} = 7.0$ ms; $t_{1inc} = 22.4$ $\mu$ s; $\tau_{dwell} = 15$ $\mu$ s; $\tau_{acq} = 15.4$ ms; $\tau_{HC} = 1.2$ ms; $\tau_{DARR} = 300$ ms; $v_{1H} = 85$ kHz                                                                                                                                                                                                                                                                                             | 21 h                          | GB = 50 Hz in $t_1$ :<br>GB = 50 Hz in $t_2$                          |
| 1,3-Glyc-FUS-LC, 10 mg              | 3D NCOCX             | $B_0 = 21.1$ T; $v_{MAS} = 13.8$ kHz; $na = 24$ ; $\tau_{pd} = 2.0$ s; $t_{1max} = 9.1$ ms; $t_{1inc} = 190$ $\mu$ s; $t_{2max} = 7.5$ ms; $t_{2inc} = 166$ $\mu$ s; $\tau_{dwell} = 5$ $\mu$ s; $\tau_{acq} = 12.0$ ms; $\tau_{HN} = 0.6$ ms; $\tau_{NC} = 5$ ms; $\tau_{DARR} = 400$ ms; $v_{1H} = 83.3$ kHz; $v_{1C} = 35$ kHz, $v_{1N} = 48$ kHz, and $v_{0C} = 176$ ppm during $\tau_{NC}$                                                                                                                                         | 115 h                         | GB = 15 Hz in $t_1$ :<br>GB = 25 Hz in $t_2$ :<br>GB = 25 Hz in $t_3$ |
| 1,3-Glyc-FUS-LC, 10 mg              | 2D CC                | $B_0 = 17.5$ T; $v_{MAS} = 12.0$ kHz; $na = 48$ ; $\tau_{pd} = 1.5$ s; $t_{1max} = 9.0$ ms; $t_{1inc} = 22.4$ $\mu$ s; $\tau_{dwell} = 15$ $\mu$ s; $\tau_{acq} = 15.4$ ms; $\tau_{HC} = 1.2$ ms; $\tau_{DARR} = 400$ ms; $v_{1H} = 85$ kHz                                                                                                                                                                                                                                                                                             | 16 h                          | GB = 50 Hz in $t_1$ :<br>GB = 50 Hz in $t_2$                          |

<sup>1</sup>B<sub>0</sub> = magnetic field; v<sub>MAS</sub> = MAS frequency; v<sub>1H</sub> = <sup>1</sup>H radio-frequency field amplitude for decoupling; v<sub>1X</sub> = radio-frequency field amplitude for cross-polarization, X = N or C (<sup>15</sup>N or <sup>13</sup>C); v<sub>0C</sub> = <sup>13</sup>C radio-frequency carrier frequency; na = number of scans per free-induction-decay;  $\tau_{pd}$  = delay between scans;  $t_{1max}$  = maximum  $t_1$  value;  $t_{1inc}$  =  $t_1$  increment;  $t_{2max}$  = maximum  $t_2$  value;  $t_{2inc}$  =  $t_2$  increment;  $\tau_{dwell}$  = digitization dwell time in free-induction-decay;  $\tau_{acq}$  = free-induction-decay acquisition time;  $\tau_{XY}$  = cross-polarization period, where X and Y are H, N, or C (<sup>1</sup>H, <sup>15</sup>N, or <sup>13</sup>C);  $\tau_{DARR}$  = DARR mixing time; GB = pure Gaussian line-broadening before Fourier transformation.

**Table S4. Summary of structural restraints in Xplor-NIH calculations, Related to Fig. 4.**

| Xplor-NIH potential term                                          | Experimental basis                                                | Restraints (per monomer) | Round 1 scale factor | Round 2 scale factor | Lowest model energy | Restraint range <sup>1</sup>        | Average violation <sup>2</sup> |
|-------------------------------------------------------------------|-------------------------------------------------------------------|--------------------------|----------------------|----------------------|---------------------|-------------------------------------|--------------------------------|
| PosDiffPot (noncrystallographic symmetry)                         | single set of chemical shifts                                     | -                        | 100                  | 100                  | 18.26               | -                                   | -                              |
| DistSymmPot (translational symmetry)                              | single set of chemical shifts, MPL data, cross- $\beta$ structure | -                        | 10000                | 10000                | 0.15                | -                                   | -                              |
| C-C RDC (intermolecular alignment with z-axis)                    | cross- $\beta$ structure                                          | 11                       | 100                  | 100                  | 7.86                | -                                   | -                              |
| C-O RDC (alignment of $\beta$ -sheet carbonyl groups with z-axis) | cross- $\beta$ structure                                          | 23                       | 0.0                  | 0.01-100             | 0.23                | -                                   | -                              |
| CDIH (backbone conformation)                                      | TALOS-N predictions                                               | 51                       | 5000                 | 5000                 | 1.67                | $\delta \pm (2\epsilon + 15^\circ)$ | $0.37 \pm 0.33^\circ$          |
| TorsionInterpolPot (backbone conformation)                        | <sup>15</sup> N-BARE data                                         | 33                       | 0.001-5.0            | 0.2-2.0              | 307.86              | -                                   | -                              |
| NOE (intermolecular distance and alignment)                       | <sup>13</sup> C PITHIRDS-CT data                                  | 11                       | 100                  | 100                  | 98.07               | $4.75 \pm 0.05 \text{ \AA}$         | $0.115 \pm 0.050 \text{ \AA}$  |
| NOE (long-range contacts)                                         | inter-residue crosspeaks with unique assignments                  | 37                       | 1-100                | 100                  | 38.37               | $5.0 \pm 3.0 \text{ \AA}$           | $0.18 \pm 0.13 \text{ \AA}$    |
| NOE (long-range contacts)                                         | inter-residue crosspeaks with partially ambiguous assignments     | 16                       | 0.01-100             | 100                  | 15.33               | $5.0 \pm 3.0 \text{ \AA}$           | $0.22 \pm 0.10 \text{ \AA}$    |
| NOE (long-range contacts)                                         | inter-residue crosspeaks with fully ambiguous assignments         | 36                       | 0.0001-100           | 100                  | 9.41                | $5.0 \pm 3.0 \text{ \AA}$           | $0.13 \pm 0.08 \text{ \AA}$    |
| NOE (backbone conformation)                                       | <sup>15</sup> N-BARE data                                         | 68                       | 10-1000              | 1000                 | 1.00                | site-dependent                      | $0.018 \pm 0.016 \text{ \AA}$  |
| RepelPot                                                          | standard atomic radii                                             | -                        | 0.004-4.0            | 0.004-4.0            | 101.59              | -                                   | -                              |
| TorsionDB                                                         | low-energy sidechain conformations                                | -                        | 0.0                  | 0.002-0.4            | 3828.97             | -                                   | -                              |
| BOND                                                              | standard bond lengths                                             | -                        | default              | default              | 22.33               | default                             | $0.002 \pm 0.002 \text{ \AA}$  |
| ANGL                                                              | standard bond angles                                              | -                        | 0.4-1.0              | 0.4-1.0              | 347.36              | default                             | $0.19 \pm 0.30 \text{ \AA}$    |
| IMPR                                                              | standard bond geometry                                            | -                        | 0.4-1.0              | 0.4-1.0              | 62.60               | default                             | $0.13 \pm 0.21^\circ$          |

<sup>1</sup>For CDIH potentials,  $\delta$  and  $\epsilon$  are the average prediction and uncertainty from TALOS-N, respectively.

<sup>2</sup>Average violations are the deviations outside the specified ranges, averaged only over distances or angles that exceed the specified ranges for the 20 structures in PDB 5W3N. Uncertainties are standard deviations.

**Table S5. Summaries of statistics, Related to Figs. 4 and 6.**

| FUS-LC structure calculations                                                           |                       |                                                           |          |
|-----------------------------------------------------------------------------------------|-----------------------|-----------------------------------------------------------|----------|
| Short range inter-residue distances<br>( $1 <  i - j  < 3$ , for residues $i$ and $j$ ) |                       | 338                                                       |          |
| Long range inter-residue distances ( $ i - j  \geq 3$ )                                 |                       | 89                                                        |          |
| backbone torsion angle restraints (from TALOS-N)                                        |                       | 51                                                        |          |
| backbone conformational restraints (from $^{15}\text{N}$ -BARE data)                    |                       | 33                                                        |          |
| MolProbity Clashscore <sup>1</sup>                                                      |                       | 1                                                         |          |
| MolProbity Ramachandran outliers <sup>2</sup>                                           |                       | 9.7                                                       |          |
| MolProbity sidechain conformer outliers <sup>2</sup>                                    |                       | 14.5                                                      |          |
| MolProbity standard geometry outliers <sup>1</sup>                                      |                       | 0                                                         |          |
| All heavy atom RMSD<br>(residues 44-54 and 63-95)                                       |                       | 1.4 Å                                                     |          |
| $C_{\alpha}$ RMSD<br>(residues 44-54 and 63-95)                                         |                       | 1.1 Å                                                     |          |
| Effects of DNA-PK phosphorylation                                                       |                       |                                                           |          |
| Hydrogel binding (threshold $\approx 0.3$ )                                             |                       | Liquid-like droplet melting<br>(threshold $\approx 0.2$ ) |          |
| site                                                                                    | location <sup>3</sup> | site                                                      | location |
| T19                                                                                     | NC                    | T19                                                       | NC       |
| S30                                                                                     | NC                    | S42                                                       | C        |
| S42                                                                                     | C                     | S54                                                       | C        |
| S54                                                                                     | C                     | T68                                                       | C        |
| S61                                                                                     | C                     | S84                                                       | C        |
| T68                                                                                     | C                     | S87                                                       | C        |
| S84                                                                                     | C                     |                                                           |          |
| S87                                                                                     | C                     |                                                           |          |
| success rate                                                                            | 6/8                   |                                                           | 5/6      |
| probability if random <sup>4</sup>                                                      | 0.0047                |                                                           | 0.0053   |

<sup>1</sup>Reported as the number of clashes or outliers per 1000 atoms in the 20 structures in PDB 5W3N.

<sup>2</sup>Reported as the percentile score with respect to all structures.

<sup>3</sup>C = core-forming segment; NC = non-core-forming segments.

<sup>4</sup>Hypergeometric statistics, based on 214 total residues, with 57 C residues and 157 NC residues.
